# Supplementary material
Source: PubMed Central journal article supplement (PMC5832574)
Supplement: NIHMS928719-supplement.pdf [file NIHMS928719-supplement.pdf]

# Supplemental information

## Table of Contents

|                                                                                                                                           |           |
|-------------------------------------------------------------------------------------------------------------------------------------------|-----------|
| <b>Supplemental figures</b>                                                                                                               | <b>2</b>  |
| Supplemental figure S1. RPKM-derived $\log_2(\text{TE})$ and scikit-ribo $\log_2(\text{TE})$ .                                            | 2         |
| Supplemental figure S2. Multi-class ROC curves for A-site prediction.                                                                     | 3         |
| Supplemental figure S3. Feature importance from the random forest model.                                                                  | 4         |
| Supplemental figure S4. Analysis of mRNA abundance in TPM by region.                                                                      | 5         |
| Supplemental figure S5. Violin plots of stAI for genes in the six regions                                                                 | 6         |
| Supplemental figure S6. Statistically enriched sequences based on scikit-ribo's TIE estimates using HOMER                                 | 7         |
| Supplemental figure S7. Statistically enriched sequences based on RPKM-derived TE estimates using HOMER                                   | 8         |
| Supplemental figure S8. Higher correlation between scikit-ribo derived PA and SRM measurement, after considering protein degradation rate | 9         |
| Supplemental figure S9. Highly reproducible TE estimates between replicates.                                                              | 10        |
| Supplemental figure S10. High correlation of codon dwell time (DT) between biological replicates.                                         | 11        |
| Supplemental figure S11. The complete workflow of Scikit-ribo analysis.                                                                   | 12        |
| <b>Supplemental Tables</b>                                                                                                                | <b>13</b> |
| Supplemental Table S1. Prediction accuracy of A-site locations.                                                                           | 13        |
| Supplemental table S2. Interpretation of the pair-wise comparison in Figure 4A.                                                           | 14        |
| Supplemental Table S3. Gene set enrichment in region 4 genes.                                                                             | 15        |

## Supplemental figures

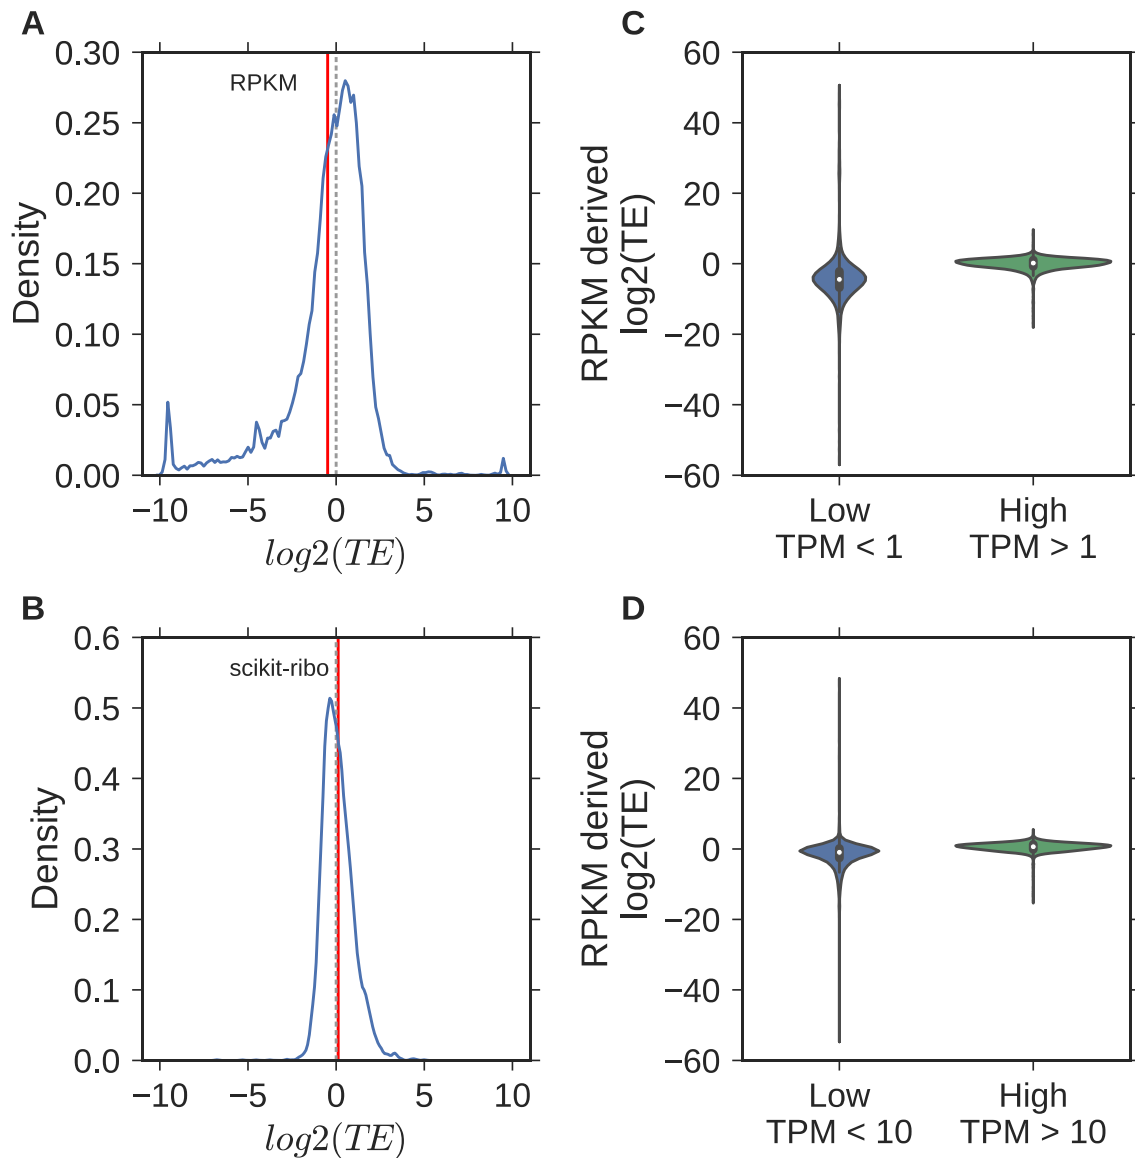

**Supplemental figure S1. RPKM-derived  $\log_2(TE)$  and scikit-ribo  $\log_2(TE)$ .** Related to Figure 1. (A) The RPKM-derived  $\log_2(TE)$  reported high dispersion among low abundance genes ( $TPM < 1$ ), while the genes with  $TPM > 1$  still reported a long tail on the negative side. (B) Scikit-ribo reported a balanced  $\log_2(TE)$  distribution (mean=0.1). The red solid line denotes the mean. (C) The RPKM-derived  $\log_2(TE)$  reported a skewed distribution (mean=-0.5). (D) Even increasing the TPM cutoff to 10, the RPKM-derived  $\log_2(TE)$  still reported a long tail on the negative side.

A

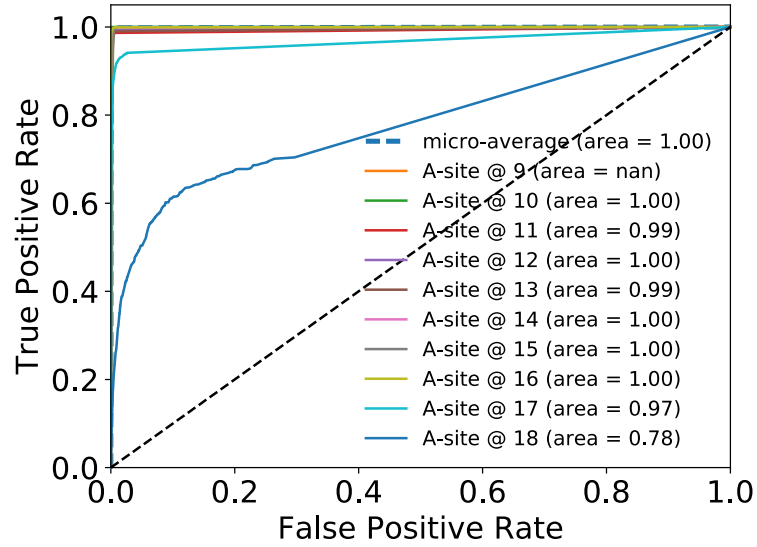

B

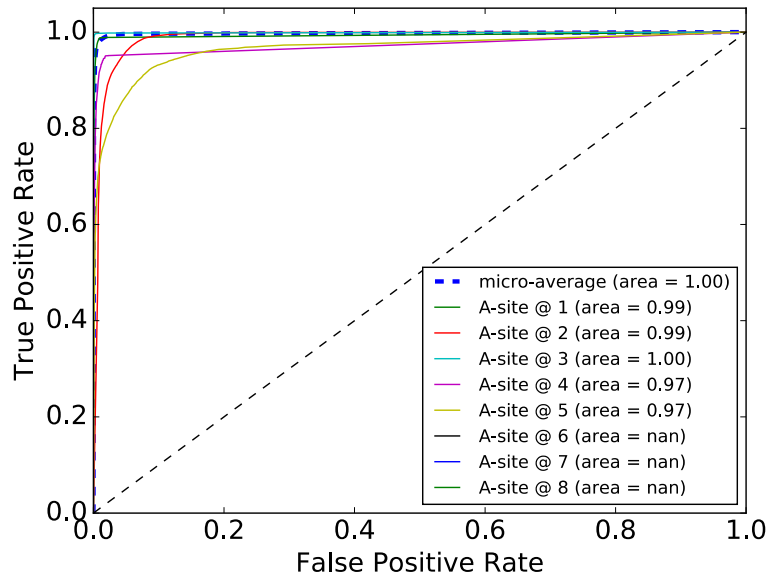

**Supplemental figure S2. Multi-class ROC curves for A-site prediction.** Related to Figure 2. (A) *S. cerevisiae* RNase I data. (B) *E. coli* RelE data. Each curve represents the data with different A-site locations (12 to 18 in RNase I, 1 to 8 in RelE). The dash line represents the micro-average across classes.

A

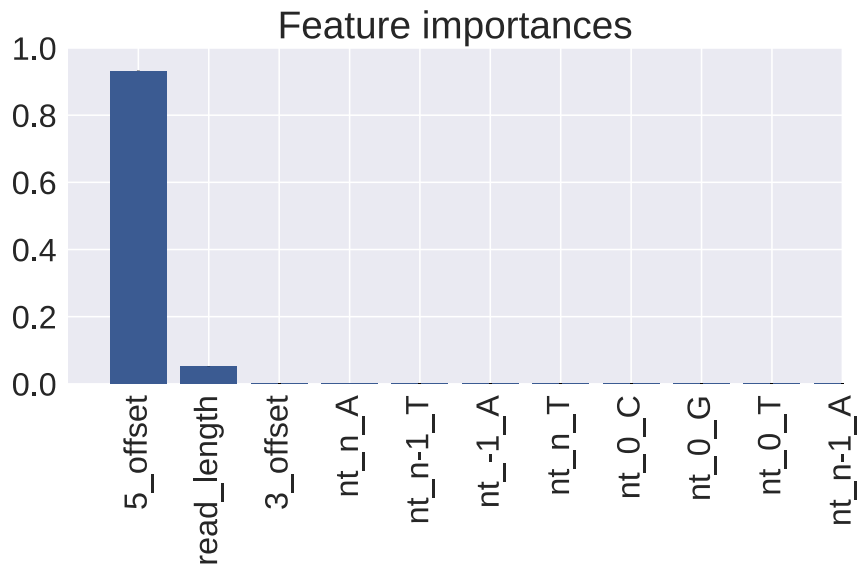

B

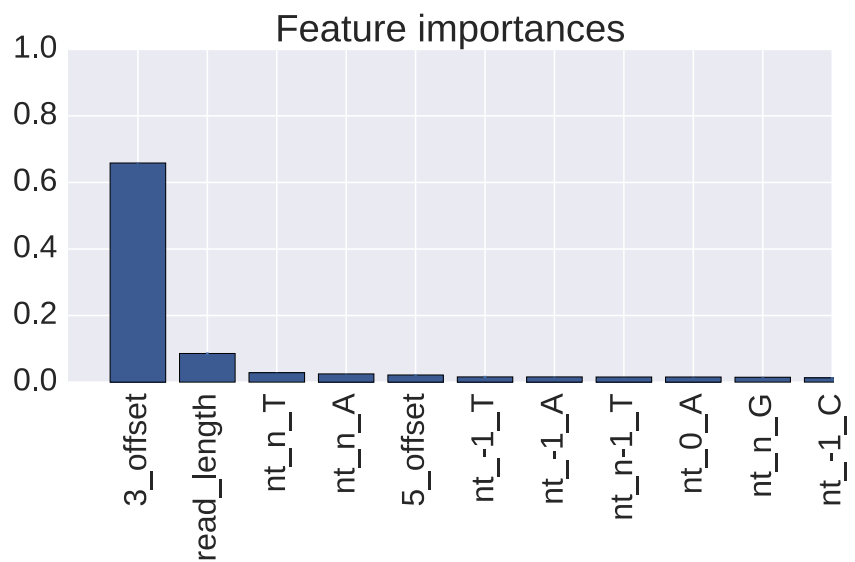

**Supplemental figure S3. Feature importance from the random forest model.** Related to Figure 2. (A) *S. cerevisiae* RNase I data. (B) *E. coli* RelE data. 5/3\_offset represents whether the 5'/3' end of the read is in the first/second/third reading frame. Nt<sub>-1</sub>/0/n-1/n represents the nucleotide at that position.

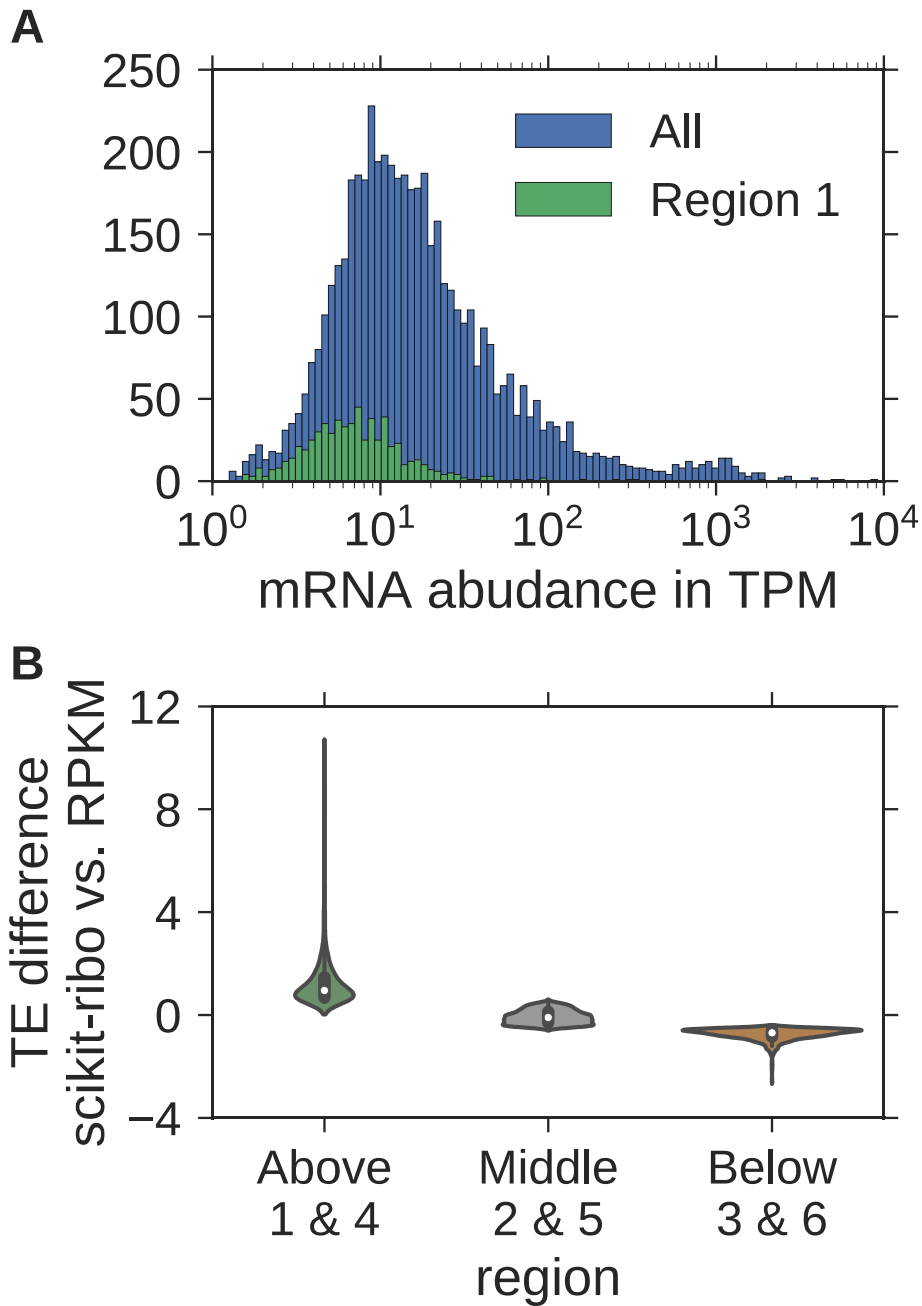

**Supplemental figure S4. Analysis of mRNA abundance in TPM by region.** Related to Figure 4; (A) Histograms of mRNA TPM in all genes (blue), and region 1 (green). (B) Violin plots of TE difference in the three regions, similar to Figure 4.

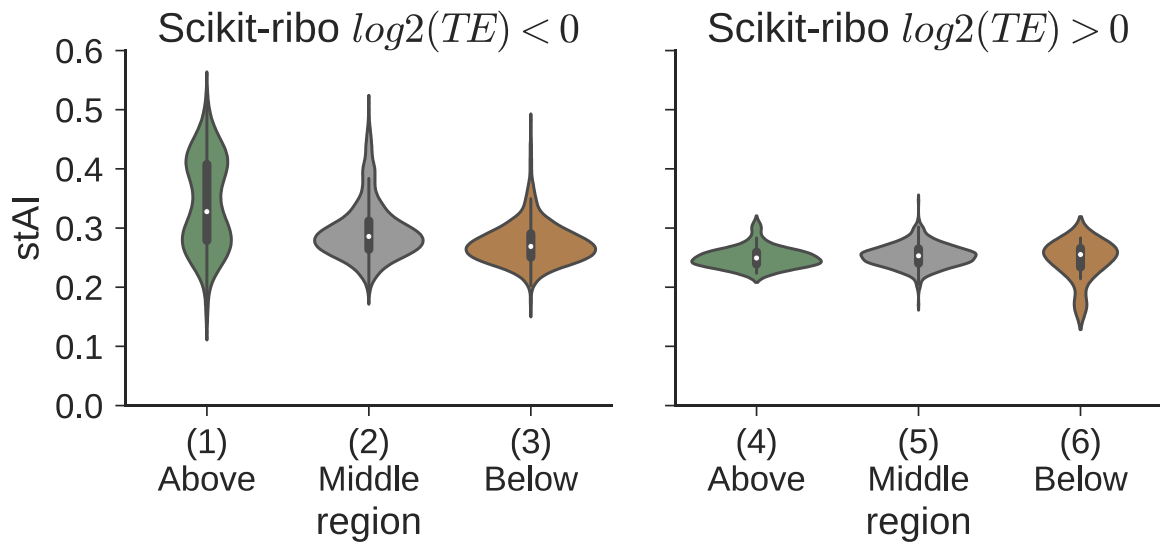

**Supplemental figure S5. Violin plots of stAI for genes in the six regions.** Related to Figure 4; left:  $\log_2(TE) < 0$ , right:  $\log_2(TE) > 0$ .

\* - possible false positive

| Rank | Motif                                                                               | P-value | log P-pvalue | % of Targets | % of Background | STD(Bg STD)     |
|------|-------------------------------------------------------------------------------------|---------|--------------|--------------|-----------------|-----------------|
| 1    |    | 1e-21   | -4.854e+01   | 21.09%       | 2.13%           | 29.2bp (31.9bp) |
| 2 *  |    | 1e-11   | -2.569e+01   | 13.61%       | 1.88%           | 14.6bp (16.2bp) |
| 3 *  |    | 1e-10   | -2.440e+01   | 4.08%        | 0.04%           | 8.7bp (14.6bp)  |
| 4 *  |    | 1e-9    | -2.266e+01   | 14.29%       | 2.49%           | 28.6bp (36.0bp) |
| 5 *  |    | 1e-8    | -2.062e+01   | 5.44%        | 0.21%           | 11.6bp (15.4bp) |
| 6 *  |    | 1e-8    | -1.945e+01   | 5.44%        | 0.24%           | 9.2bp (16.0bp)  |
| 7 *  |    | 1e-8    | -1.897e+01   | 5.44%        | 0.26%           | 20.4bp (31.5bp) |
| 8 *  |    | 1e-8    | -1.878e+01   | 16.33%       | 4.06%           | 27.9bp (38.8bp) |
| 9 *  |   | 1e-7    | -1.777e+01   | 4.08%        | 0.11%           | 6.1bp (16.6bp)  |
| 10 * |  | 1e-6    | -1.479e+01   | 7.48%        | 1.01%           | 17.3bp (17.7bp) |
| 11 * |  | 1e-6    | -1.436e+01   | 2.72%        | 0.04%           | 9.5bp (11.8bp)  |
| 12 * |  | 1e-4    | -1.031e+01   | 25.17%       | 12.76%          | 28.9bp (35.5bp) |
| 13 * |  | 1e-1    | -3.783e+00   | 0.68%        | 0.02%           | 0.5bp (15.8bp)  |
| 14 * |  | 1e0     | -2.205e+00   | 33.33%       | 28.41%          | 23.6bp (33.8bp) |

**Supplemental figure S6. Statistically enriched sequences based on scikit-ribo's TIE estimates using HOMER.** Related to Figure 4; The Homer's suggested p-value threshold is  $1 \times 10^{-10}$  to  $1 \times 10^{-12}$ .

\* - possible false positive

| Rank | Motif                                                                               | P-value | log P-pvalue | % of Targets | % of Background | STD(Bg STD)     |
|------|-------------------------------------------------------------------------------------|---------|--------------|--------------|-----------------|-----------------|
| 1 *  |    | 1e-11   | -2.587e+01   | 9.95%        | 1.34%           | 12.2bp (14.3bp) |
| 2 *  |    | 1e-9    | -2.123e+01   | 2.49%        | 0.02%           | 10.1bp (17.9bp) |
| 3 *  |    | 1e-7    | -1.829e+01   | 4.98%        | 0.40%           | 12.6bp (16.0bp) |
| 4 *  |    | 1e-7    | -1.705e+01   | 4.98%        | 0.45%           | 11.2bp (14.7bp) |
| 5 *  |    | 1e-6    | -1.586e+01   | 4.98%        | 0.52%           | 15.6bp (18.8bp) |
| 6 *  |    | 1e-6    | -1.442e+01   | 6.47%        | 1.12%           | 14.5bp (17.0bp) |
| 7 *  |    | 1e-6    | -1.393e+01   | 5.47%        | 0.80%           | 14.2bp (14.0bp) |
| 8 *  |    | 1e-6    | -1.385e+01   | 8.46%        | 2.03%           | 9.1bp (17.7bp)  |
| 9 *  |   | 1e-5    | -1.199e+01   | 5.47%        | 0.98%           | 9.3bp (21.4bp)  |
| 10 * |  | 1e-4    | -1.111e+01   | 3.98%        | 0.53%           | 11.5bp (13.9bp) |

Supplemental figure S7. Statistically enriched sequences based on RPKM-derived TE estimates using HOMER. Related to Figure 4; The Homer's suggested p-value threshold is  $1 \times 10^{-10}$  to  $1 \times 10^{-12}$ .



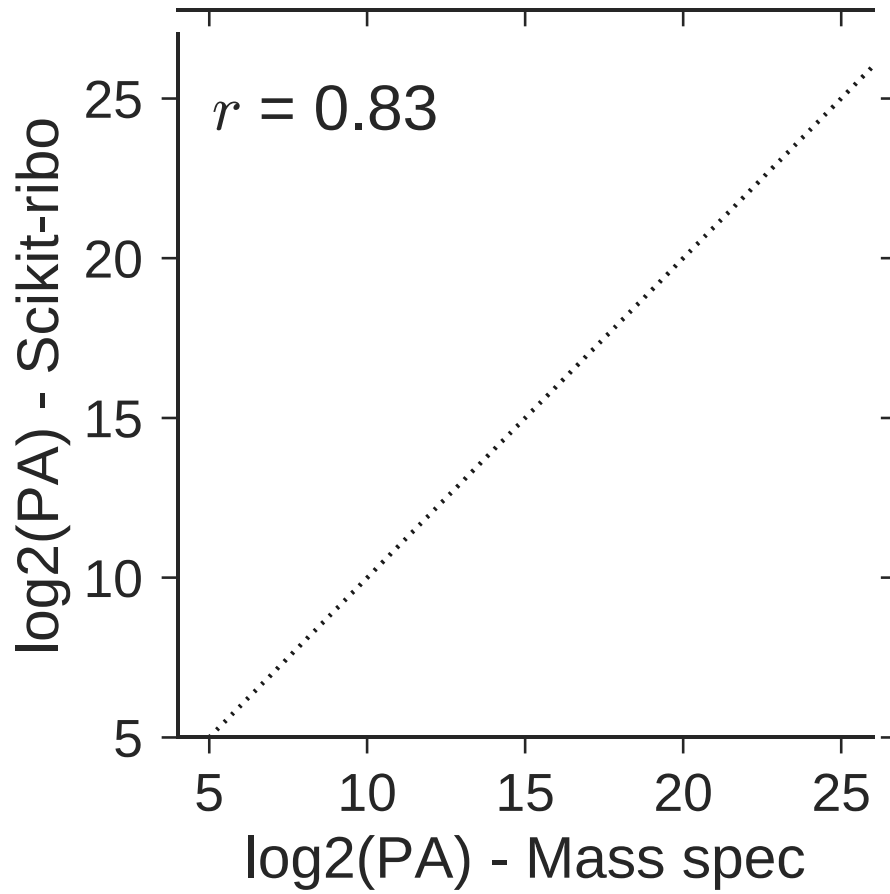

**Supplemental figure S8. Higher correlation between scikit-ribo derived PA and SRM measurement, after considering protein degradation rate.** Related to Figure 5; The protein degradation rate was obtained from Christiano et al ( $r = 0.83$ ).

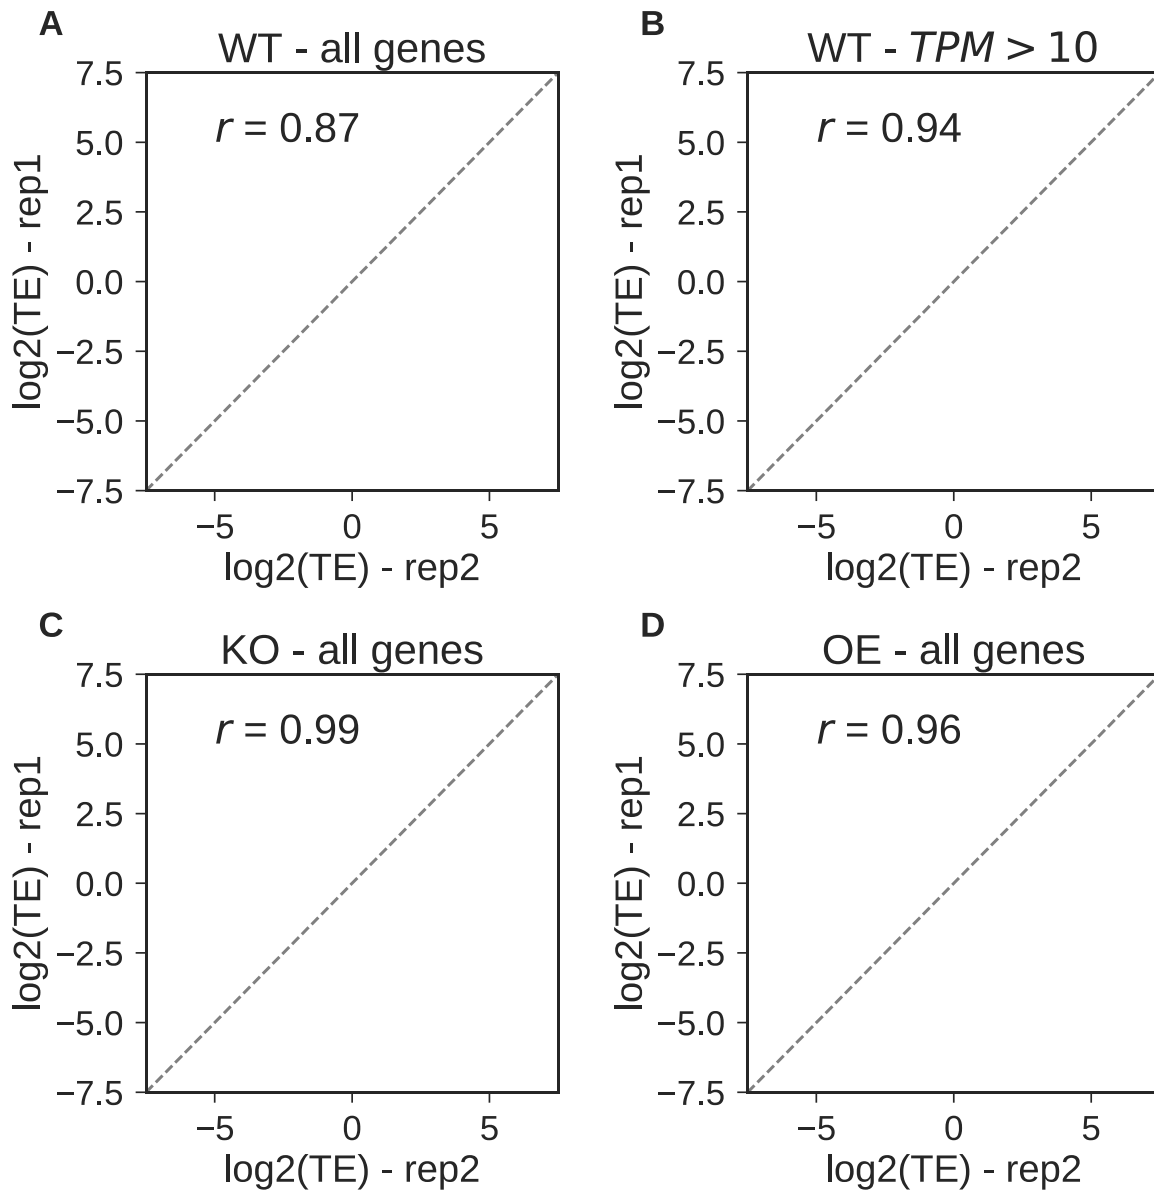

**Supplemental figure S9. Highly reproducible TE estimates between replicates.** Related to Figure 6; (A) WT: wild type, 55 million and 16.7 million in replicate 1 and 2 ( $r=0.87$ ). (B) WT with TPM greater than ( $r=0.94$ ). (C) KO: knock out *Dhh1p* ( $r=0.99$ ), 74 million and 56 million in replicate 1 and 2. (D) OE: Overexpression of *Dhh1p*, 80 million and 39 million in replicate 1 and 2 ( $r=0.96$ ). The correlation was a function of the number of reads in each replicate. the mean correlation of  $\log(\text{TE})$  were all very high between the biological replicates for a given strain ( $r=0.95$ ), indicating that the data are of high quality and that the inference procedures in Scikit-ribo are stable.

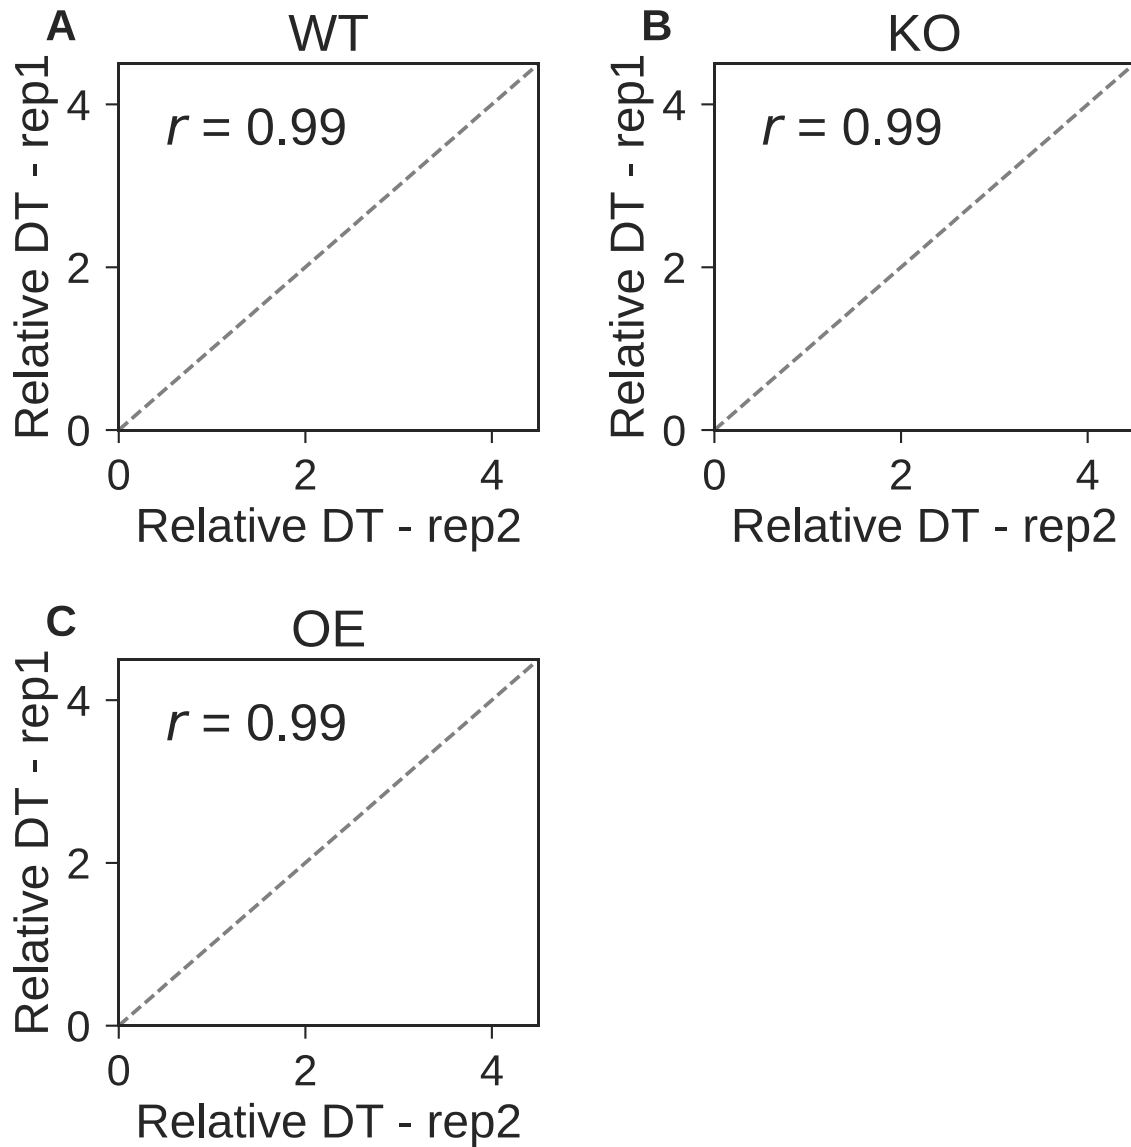

**Supplemental figure S10. High correlation of codon dwell time (DT) between biological replicates.** Related to Figure 6; (A) wild-type, range of DT: 2.01, SD: 0.36, (B) KO, range: 3.05, SD: 0.45, (C) OE, range: 1.35, SD: 0.27. WT: wild type, KO: knock out *Dhh1p*, OE: Overexpression of *Dhh1p*. The mean correlation of relative DT and were all very high between the biological replicates for a given strain ( $r=0.99$ ), indicating that the data are of high quality and that the inference procedures in Scikit-ribo are stable.

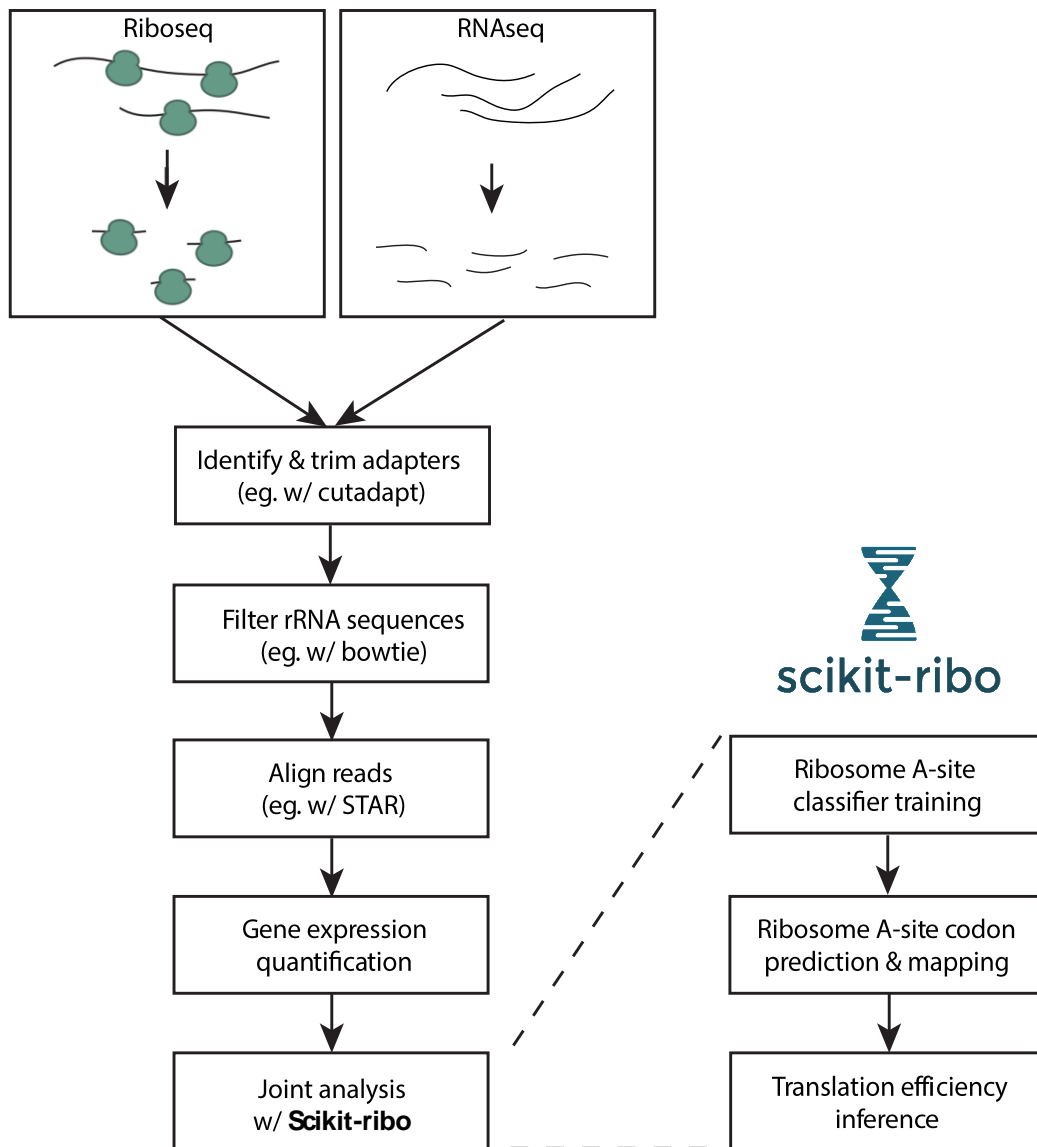

**Supplemental figure S11. The complete workflow of Scikit-ribo analysis.** First the RNA-seq and Riboseq sequencing reads are preprocessed to cut adapter sequences, filter rRNA reads, and then quantify the gene expression from the aligned RNAseq reads. After this pre-processing, Scikit-ribo is then used to predict the A-site locations and analyze the translation efficiency. Related to Figure 2.

## Supplemental Tables

| Study                               | SRR #      | Mean accuracy | SD    | # Optimal features |
|-------------------------------------|------------|---------------|-------|--------------------|
| <b><i>S. cerevisiae</i> RNase I</b> |            |               |       |                    |
| Weinberg et al (2016)               | SRR1049521 | 0.987         | 0.004 | 3                  |
| Radhakrishnan et al (2016)          | SRR3493886 | 0.981         | 0.008 | 2                  |
| Radhakrishnan et al (2016)          | SRR3493887 | 0.929         | 0.036 | 2                  |
| Radhakrishnan et al (2016)          | SRR3493890 | 0.982         | 0.008 | 4                  |
| Radhakrishnan et al (2016)          | SRR3493891 | 0.963         | 0.022 | 2                  |
| Radhakrishnan et al (2016)          | SRR3493894 | 0.941         | 0.019 | 7                  |
| Radhakrishnan et al (2016)          | SRR3493895 | 0.936         | 0.025 | 2                  |
| Radhakrishnan et al (2016)          | SRR3493898 | 0.938         | 0.03  | 2                  |
| <b><i>E. coli</i> RelE</b>          |            |               |       |                    |
| Hwang et al (2016)                  | SRR4023280 | 0.910         | 0.041 | 1                  |
| Hwang et al (2016)                  | SRR4023281 | 0.810         | 0.043 | 1                  |

**Supplemental Table S1. Prediction accuracy of A-site locations.** Related to Figure 2. Mean and SD were computed via 10-fold cross validation. SD: standard deviation.

| Region | Comparison              | Sign of $\log_2(\text{TE})$ | # genes | Color  |
|--------|-------------------------|-----------------------------|---------|--------|
| 1      | Under-estimated by RPKM | Negative                    | 629     | Green  |
| 2      | Similar                 | Negative                    | 1846    | Gray   |
| 3      | Over-estimated by RPKM  | Negative                    | 79      | Orange |
| 4      | Under-estimated by RPKM | Positive                    | 268     | Green  |
| 5      | Similar                 | Positive                    | 1305    | Gray   |
| 6      | Over-estimated by RPKM  | Positive                    | 981     | Orange |

**Supplemental table S2. Interpretation of the pair-wise comparison in Figure 4A.** Related to Figure 4; The sign of  $\log_2(\text{TE})$  are based on TE of Scikit-ribo.  $\Delta \log_2(\text{TE}) = \log_2(\text{TE}_{\text{scikit-ribo}}) - \log_2(\text{TE}_{\text{RPKM}})$ . For gene with  $\Delta \log_2(\text{TE}) < -0.5$ , they were previously underestimated by RPKM-derived TE, and genes with  $\Delta \log_2(\text{TE}) < -0.5$  were previously overestimated, and other genes have similar TE.

| GO Term                      | Accession # | p-value             | # genes |
|------------------------------|-------------|---------------------|---------|
| cytoplasmic translation      | GO:0002181  | $3 \times 10^{-25}$ | 49      |
| translational elongation     | GO:0006414  | $1 \times 10^{-8}$  | 59      |
| ribosome assembly            | GO:0042255  | $2 \times 10^{-6}$  | 19      |
| translation                  | GO:0006412  | $3 \times 10^{-6}$  | 63      |
| peptide biosynthetic process | GO:0043043  | $4 \times 10^{-6}$  | 63      |

**Supplemental Table S3. Gene set enrichment in region 4 genes.** Related to Figure 4; There were 268 genes in region 4: 1) positive Scikit-ribo  $\log_2(\text{TE})$ , 2) previously under-estimated by RPKM derived TE. The p-values shown were adjusted with Bonferroni correction.
